# Supplementary material for: Multicomponent Training Improves the Quality of Life of Older Adults at Risk of Frailty
Source: MDPI journal article supplement (doi:10.3390/healthcare11212844), 2023-10-28
Supplement: s1 [file s1]

**Supplementary material Table S1.** Relationships between baseline body composition, physical fitness, nutritional variables values and total score in the EQ-5D-3L

|                                      | EQ-5D-3L overall index |              |                      |                  | EQ-VAS |              |                      |              |
|--------------------------------------|------------------------|--------------|----------------------|------------------|--------|--------------|----------------------|--------------|
|                                      | $r^2$                  | Change $r^2$ | Standardized $\beta$ | p-value          | $r^2$  | Change $r^2$ | Standardized $\beta$ | p-value      |
| <i>Body composition measurements</i> |                        |              |                      |                  |        |              |                      |              |
| Weight(kg)                           | 0.114                  | 0.093        | −0.372               | <b>0.002</b>     | 0.019  | 0.001        | −0.032               | 0.800        |
| BMI (kg/cm <sup>2</sup> )            | 0.185                  | 0.168        | −0.453               | <b>&lt;0.001</b> | 0.032  | 0.013        | −0.128               | 0.299        |
| FM (kg)                              | 0.223                  | 0.174        | −0.462               | <b>&lt;0.001</b> | 0.040  | 0.003        | −0.06                | 0.599        |
| FFM (Kg)                             | 0.019                  | 0.003        | −0.093               | 0.577            | 0.041  | 0.003        | 0.092                | 0.558        |
| FM%                                  | 0.230                  | 0.181        | −0.514               | <b>&lt;0.001</b> | 0.044  | 0.007        | −0.101               | 0.431        |
| Waist circum. (cm)                   | 0.151                  | 0.128        | −0.421               | <b>0.005</b>     | 0.045  | 0.021        | −0.171               | 0.191        |
| Hip circum. (cm)                     | 0.120                  | 0.119        | −0.365               | <b>0.004</b>     | 0.029  | 0.014        | −0.125               | 0.329        |
| <i>Physical fitness variables</i>    |                        |              |                      |                  |        |              |                      |              |
| Balance (s)                          | 0.112                  | 0.091        | 0.311                | <b>0.002</b>     | 0.043  | 0.022        | 0.152                | 0.135        |
| Arm Flexibility (cm)                 | 0.076                  | 0.055        | 0.241                | <b>0.016</b>     | 0.042  | 0.021        | 0.148                | 0.143        |
| Leg Flexibility(cm)                  | 0.051                  | 0.030        | 0.182                | 0.153            | 0.052  | 0.032        | 0.186                | 0.144        |
| Leg Strength (rep)                   | 0.148                  | 0.127        | 0.363                | <b>&lt;0.001</b> | 0.054  | 0.033        | 0.185                | 0.065        |
| Arm Strength (rep)                   | 0.074                  | 0.050        | 0.237                | <b>0.022</b>     | 0.048  | 0.027        | 0.172                | 0.100        |
| Agility (s)                          | 0.237                  | 0.219        | −0.499               | <b>&lt;0.001</b> | 0.070  | 0.050        | −0.231               | <b>0.025</b> |
| Walking speed (s)                    | 0.306                  | 0.285        | −0.550               | <b>&lt;0.001</b> | 0.092  | 0.071        | −0.276               | <b>0.006</b> |
| Aerobic capacity (m)                 | 0.269                  | 0.254        | 0.532                | <b>&lt;0.001</b> | 0.082  | 0.062        | 0.263                | <b>0.012</b> |
| Handgrip Strength                    | 0.089                  | 0.049        | 0.339                | <b>0.024</b>     | 0.054  | 0.015        | 0.209                | 0.209        |
| <i>Nutritional Variables</i>         |                        |              |                      |                  |        |              |                      |              |
| MNA                                  | 0.135                  | 0.072        | 0.274                | <b>0.004</b>     | 0.051  | 0.008        | −0.183               | 0.398        |
| ADM                                  | 0.068                  | 0.037        | 0.006                | 0.397            | 0.08   | 0.041        | 0.204                | <b>0.048</b> |

CON: control group, TRAIN: training group, EQ-5D-3L: EuroQol 5 Dimensions 3 Levels, BMI: Body Mass Index, FM: Fat Mass, FFM: Fat Free Mass, FM%: Fat Mass Percentage, Circum: Circumference, MNA: Mini Nutritional Assessment, ADM: Adherence to Mediterranean Diet, rep: repetitions. Significant p-values were set as <0.05.

**Supplementary material Table S2a.** Relationships between changes with training in body composition, physical fitness and changes in total score in the EQ-5D-3L

|                                      | CON            |                          |                   |             | TRAIN          |                          |                   |              |
|--------------------------------------|----------------|--------------------------|-------------------|-------------|----------------|--------------------------|-------------------|--------------|
|                                      | r <sup>2</sup> | Change<br>r <sup>2</sup> | Standardized<br>β | p-<br>value | r <sup>2</sup> | Change<br>r <sup>2</sup> | Standardized<br>β | p-<br>value  |
| <i>Body composition measurements</i> |                |                          |                   |             |                |                          |                   |              |
| Weight (kg)                          | 0.072          | 0.034                    | −0.193            | 0.388       | 0.041          | 0.029                    | −0.177            | 0.269        |
| BMI                                  | 0.080          | 0.041                    | −0.207            | 0.409       | 0.052          | 0.047                    | −0.221            | 0.240        |
| FM (kg)                              | 0.039          | 0.000                    | −0.004            | 0.988       | 0.062          | 0.050                    | −0.229            | 0.182        |
| FFM (Kg)                             | 0.099          | 0.060                    | −0.259            | 0.274       | 0.013          | 0.001                    | −0.030            | 0.867        |
| FM%                                  | 0.054          | 0.015                    | 0.135             | 0.585       | 0.032          | 0.020                    | −0.144            | 0.406        |
| Waist circum.<br>(cm)                | 0.024          | 0.001                    | 0.029             | 0.926       | 0.077          | 0.072                    | −0.354            | 0.158        |
| Hip circum.<br>(cm)                  | 0.217          | 0.060                    | −0.277            | 0.376       | 0.089          | 0.007                    | −0.087            | 0.644        |
| <i>Physical fitness variables</i>    |                |                          |                   |             |                |                          |                   |              |
| Balance (s)                          | 0.057          | 0.027                    | 0.173             | 0.396       | 0.387          | 0.083                    | −0.296            | 0.058        |
| Arm<br>Flexibility<br>(cm)           | 0.025          | 0.000                    | −0.019            | 0.922       | 0.067          | 0.000                    | −0.004            | 0.980        |
| Leg Flexibility<br>(cm)              | 0.080          | 0.056                    | 0.237             | 0.229       | 0.086          | 0.009                    | −0.097            | 0.554        |
| Leg Strength<br>(rep)                | 0.033          | 0.003                    | 0.057             | 0.776       | 0.071          | 0.002                    | −0.052            | 0.763        |
| Arm Strength<br>(rep)                | 0.049          | 0.013                    | −0.120            | 0.558       | 0.232          | 0.084                    | 0.321             | <b>0.048</b> |
| Agility (s)                          | 0.070          | 0.039                    | 0.204             | 0.323       | 0.069          | 0.029                    | −0.181            | 0.269        |
| Walking speed<br>(s)                 | 0.123          | 0.093                    | 0.305             | 0.110       | 0.071          | 0.070                    | −0.269            | 0.082        |
| Aerobic<br>capacity (m)              | 0.046          | 0.002                    | 0.043             | 0.842       | 0.205          | 0.128                    | 0.360             | <b>0.018</b> |
| Handgrip<br>Strength (kg)            | 0.048          | 0.018                    | 0.136             | 0.493       | 0.257          | 0.190                    | −0.480            | 0.189        |

CON: control group, TRAIN: training group, EQ-5D-3L: EuroQol 5 Dimensions 3 Levels, BMI: Body Mass Index, FM: Fat Mass, FFM: Fat Free Mass, FM%: Fat Mass Percentage, Circum: Circumference, rep: repetitions. Significant p-values were set as <0.05.

**Supplementary material Table S2b.** Relationships between changes with training in body composition, physical fitness and changes in total score in the EQ-VAS

|                                      | CON   |              |                      |         | TRAIN |              |                      |              |
|--------------------------------------|-------|--------------|----------------------|---------|-------|--------------|----------------------|--------------|
|                                      | $r^2$ | Change $r^2$ | Standardized $\beta$ | p-value | $r^2$ | Change $r^2$ | Standardized $\beta$ | p-value      |
| <i>Body composition measurements</i> |       |              |                      |         |       |              |                      |              |
| Weight (kg)                          | 0.242 | 0.001        | 0.040                | 0.838   | .113  | .101         | −0.329               | <b>0.048</b> |
| BMI                                  | 0.113 | 0.000        | −0.012               | 0.961   | 0.122 | 0.083        | −0.293               | 0.110        |
| FM (kg)                              | 0.247 | 0.000        | −0.001               | 0.998   | 0.047 | 0.009        | −0.098               | 0.568        |
| FFM (Kg)                             | 0.250 | 0.003        | 0.061                | 0.768   | 0.077 | 0.039        | −0.209               | 0.232        |
| FM%                                  | 0.080 | 0.078        | 0.302                | 0.209   | 0.116 | 0.006        | −0.078               | 0.635        |
| Waist circum. (cm)                   | 0.139 | 0.010        | −0.115               | 0.685   | 0.054 | 0.002        | −0.057               | 0.818        |
| Hip circum. (cm)                     | 0.167 | 0.020        | −0.157               | 0.605   | 0.101 | 0.051        | −0.228               | 0.227        |
| <i>Physical fitness variables</i>    |       |              |                      |         |       |              |                      |              |
| Balance (s)                          | 0.138 | 0.008        | 0.498                | 0.623   | 0.016 | 0.000        | −0.012               | 0.940        |
| Arm Flexibility (cm)                 | 0.145 | 0.001        | 0.023                | 0.902   | 0.056 | 0.040        | −0.221               | 0.207        |
| Leg Flexibility (cm)                 | 0.173 | 0.028        | −0.169               | 0.363   | 0.043 | 0.022        | 0.157                | 0.352        |
| Leg Strength (rep)                   | 0.132 | 0.002        | −0.044               | 0.818   | 0.041 | 0.025        | −0.174               | 0.328        |
| Arm Strength (rep)                   | 0.111 | 0.048        | −0.228               | 0.255   | 0.033 | 0.021        | −0.160               | 0.371        |
| Agility (s)                          | 0.150 | 0.044        | 0.071                | 0.716   | 0.040 | 0.023        | 0.162                | 0.336        |
| Walking speed (s)                    | 0.133 | 0.003        | −0.055               | 0.766   | 0.017 | 0.001        | 0.034                | 0.832        |
| Aerobic capacity (m)                 | 0.147 | 0.005        | −0.071               | 0.728   | 0.034 | 0.013        | −0.117               | 0.471        |
| Handgrip Strength (kg)               | 0.112 | 0.000        | −0.010               | 0.960   | 0.021 | 0.005        | 0.430                | 0.670        |

CON: control group, TRAIN: training group, EQ-5D-3L: EuroQol 5 Dimensions 3 Levels, BMI: Body Mass Index, FM: Fat Mass, FFM: Fat Free Mass, FM%: Fat Mass Percentage, Circum: Circumference, rep: repetitions. Significant p-values were set as <0.05.
